# Supplementary material for: Chlorination and tautomerism: a computational and UPS/XPS study of 2-hydroxypyridine ⇌ 2-pyridone equilibrium
Source: Royal Society of Chemistry journal article supplement (doi:10.1039/d0cp02304c), 2020-01-01
Supplement: d0cp02304c1.pdf [file d0cp02304c1.pdf]

## Electronic Supporting Information

### How chlorination affects prototropic tautomerism: the 2-hydroxypyridine/2-pyridone equilibrium explored by X-ray photoemission spectroscopy

Sonia Melandri, Luca Evangelisti, Sofia Canola, Hanan Sa'adeh, Camilla Calabrese,  
Marcello Coreno, Cesare Grazioli, Kevin C. Prince,\* Fabrizia Negri,\* Assimo Maris\*

#### Theoretical results (TD)-B3LYP/aug-cc-pVTZ

- Figure S01. Optimized geometries of 2-pyridone in the  $S_0$ ,  $D_0$  and  $D_1$  states.
- Figure S02. Optimized geometries of 2-hydroxypyridine in the  $S_0$  and  $D_0$  states.
- Figure S03. Optimized geometries of 3-chloro-2-pyridone in the  $S_0$ ,  $D_0$  and  $D_1$  states.
- Figure S04. Optimized geometries of 3-chloro-2-hydroxypyridine in the  $S_0$ ,  $D_0$  and  $D_1$  states.
- Figure S05. Optimized geometries of 4-chloro-2-pyridone in the  $S_0$ ,  $D_0$  and  $D_1$  states.
- Figure S06. Optimized geometries of 4-chloro-2-hydroxypyridine in the  $S_0$  and  $D_0$  states.
- Figure S07. Optimized geometries of 5-chloro-2-pyridone in the  $S_0$ ,  $D_0$  and  $D_1$  states.
- Figure S08. Optimized geometries of 5-chloro-2-hydroxypyridine in the  $S_0$ ,  $D_0$  and  $D_1$  states.
- Figure S09. Optimized geometries of 6-chloro-2-pyridone in the  $S_0$ ,  $D_0$  and  $D_1$  states.
- Figure S10. Optimized geometries of 6-chloro-2-hydroxypyridine in the  $S_0$ ,  $D_0$  and  $D_1$  states.
- Figure S11. Frontier molecular orbitals of 2-pyridone at  $D_1$  geometry.
- Figure S12. Frontier molecular orbitals of 2-hydroxypyridine at  $D_1$  geometry.
- Figure S13. Frontier molecular orbitals of 3-chloro-2-pyridone at  $D_1$  geometry.
- Figure S14. Frontier molecular orbitals of 3-chloro-2-hydroxypyridine at  $D_1$  geometry.
- Figure S15. Frontier molecular orbitals of 5-chloro-2-pyridone at  $D_1$  geometry.
- Figure S16. Frontier molecular orbitals of 5-chloro-2-hydroxypyridine at  $D_1$  geometry.
- Figure S17. Frontier molecular orbitals of 6-chloro-2-pyridone at  $D_1$  geometry.
- Figure S18. Frontier molecular orbitals of 6-chloro-2-hydroxypyridine at  $D_1$  geometry.
- Figure S19. The most active vibrational normal modes in the  $D_0$  state of 2-pyridone and its chlorinated analogues. Only modes with Huang Rhys factors greater than 0.1 are reported. The modes are collected in two groups: below and above  $1000\text{ cm}^{-1}$ .
- Figure S20. The most active vibrational normal modes in the  $D_0$  state of 2-hydroxypyridine and its chlorinated analogues. Only modes with Huang Rhys factors greater than 0.1 are reported. The modes are collected in two groups: below and above  $1000\text{ cm}^{-1}$ .
- Figure S21. The most active vibrational normal modes in the  $D_1$  state of 2-pyridone and its chlorinated analogues. Only modes with Huang Rhys factors greater than 0.1 are reported. The modes are collected in two groups: below and above  $1000\text{ cm}^{-1}$ .
- Figure S22. The most active vibrational normal modes in the  $D_1$  state of 2-hydroxypyridine and its chlorinated analogues. Only modes with Huang Rhys factors greater than 0.1 are reported. The modes are collected in two groups: below and above  $1000\text{ cm}^{-1}$ .

Figure S01.  
Optimized geometries of 2-pyridone in the  $S_0$ ,  $D_0$  and  $D_1$  states.

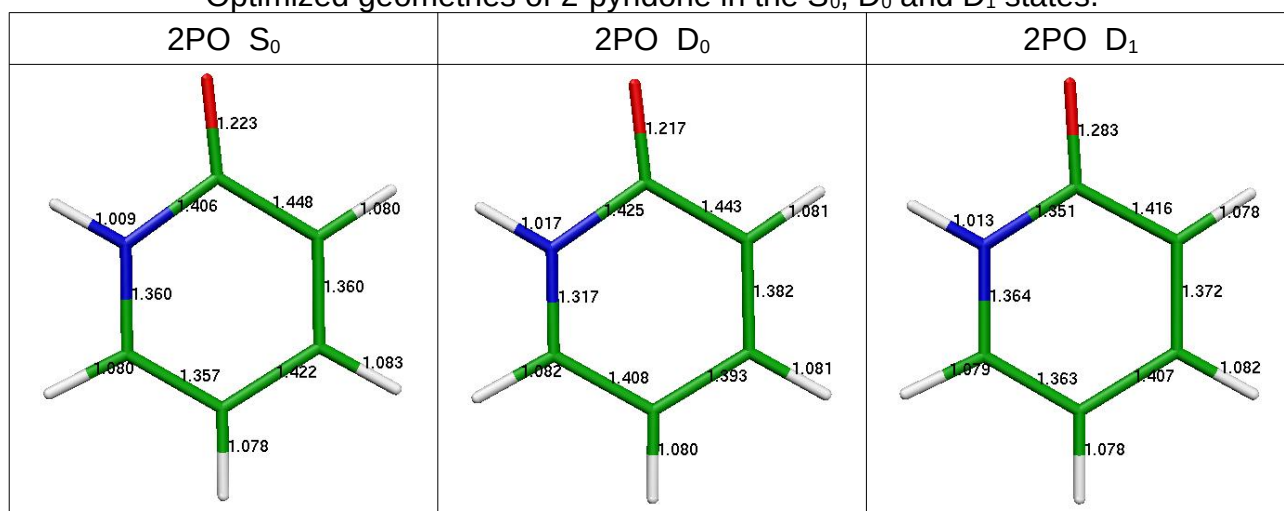

Figure S02.  
Optimized geometries of 2-hydroxypyridine in the  $S_0$  and  $D_0$  states.

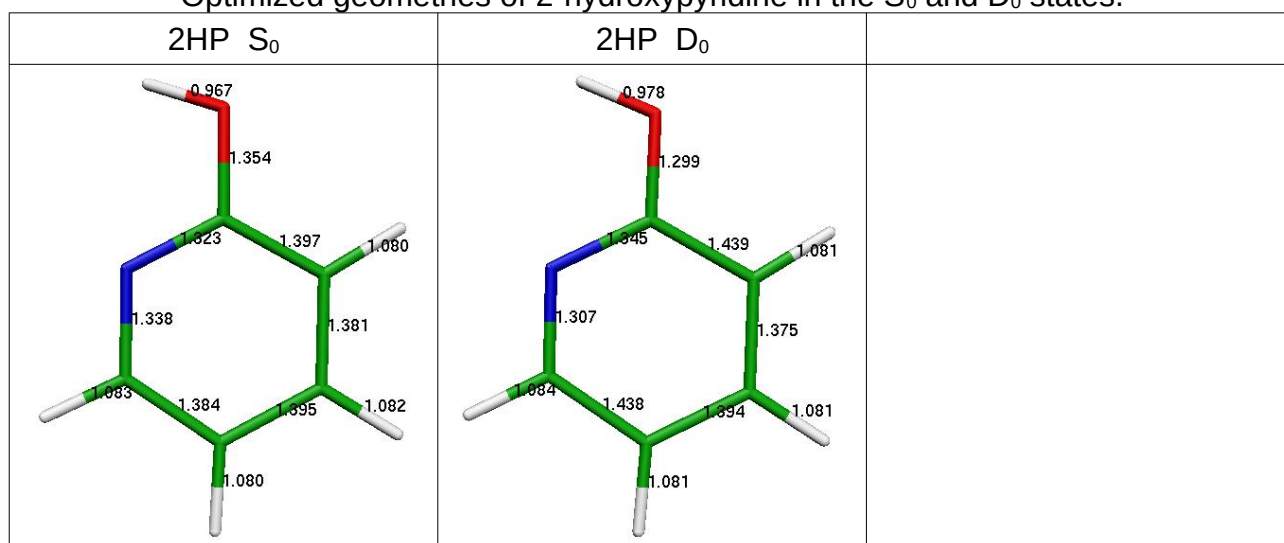

Figure S03.

Optimized geometries of 3-chloro-2-pyridone in the  $S_0$ ,  $D_0$  and  $D_1$  states.

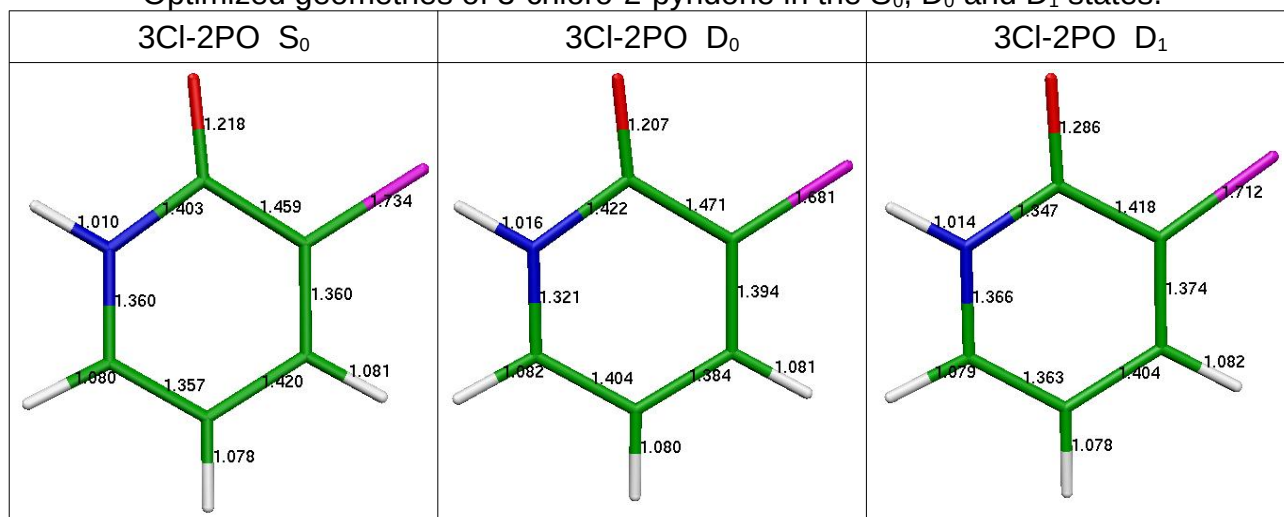

Figure S04.

Optimized geometries of 3-chloro-2-hydroxypyridine in the  $S_0$ ,  $D_0$  and  $D_1$  states.

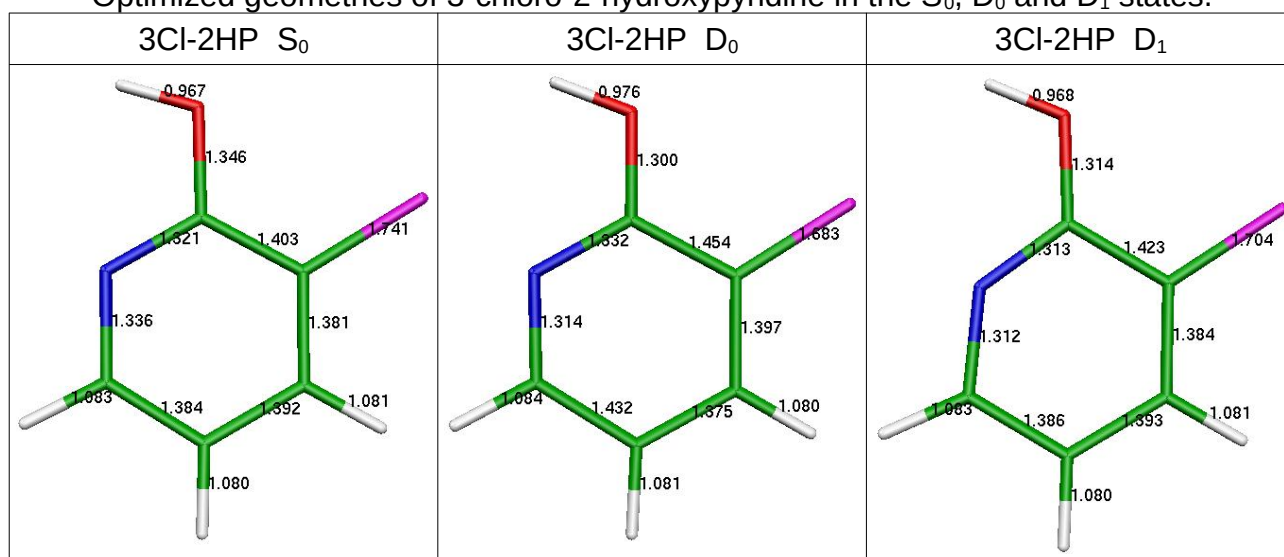





Figure S07.

Optimized geometries of 5-chloro-2-pyridone in the  $S_0$ ,  $D_0$  and  $D_1$  states.

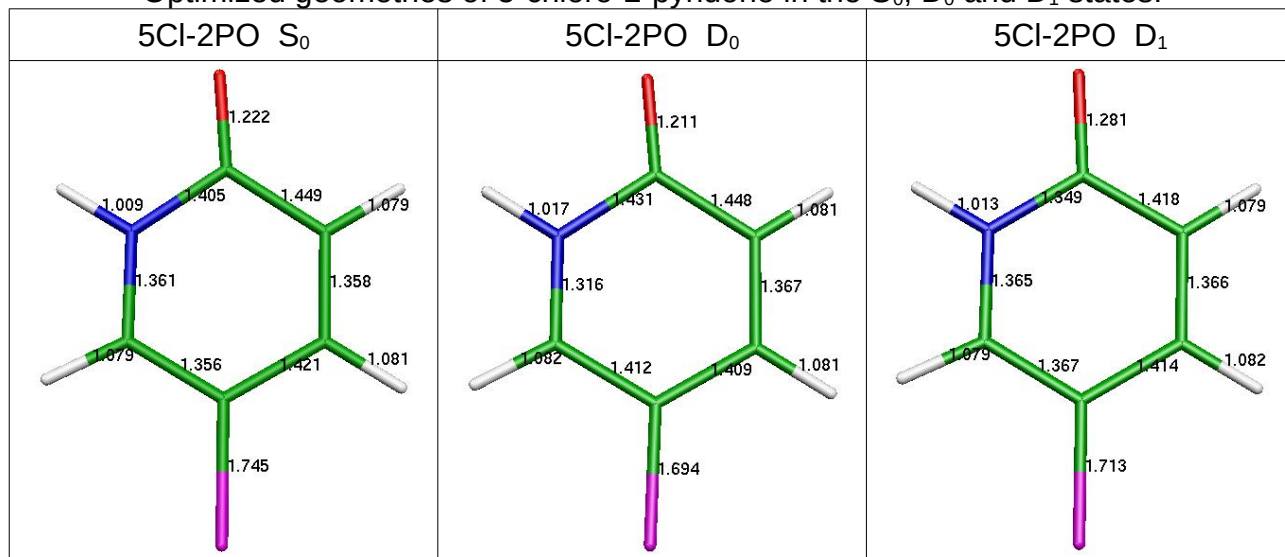

Figure S08.

Optimized geometries of 5-chloro-2-hydroxypyridine in the  $S_0$ ,  $D_0$  and  $D_1$  states.

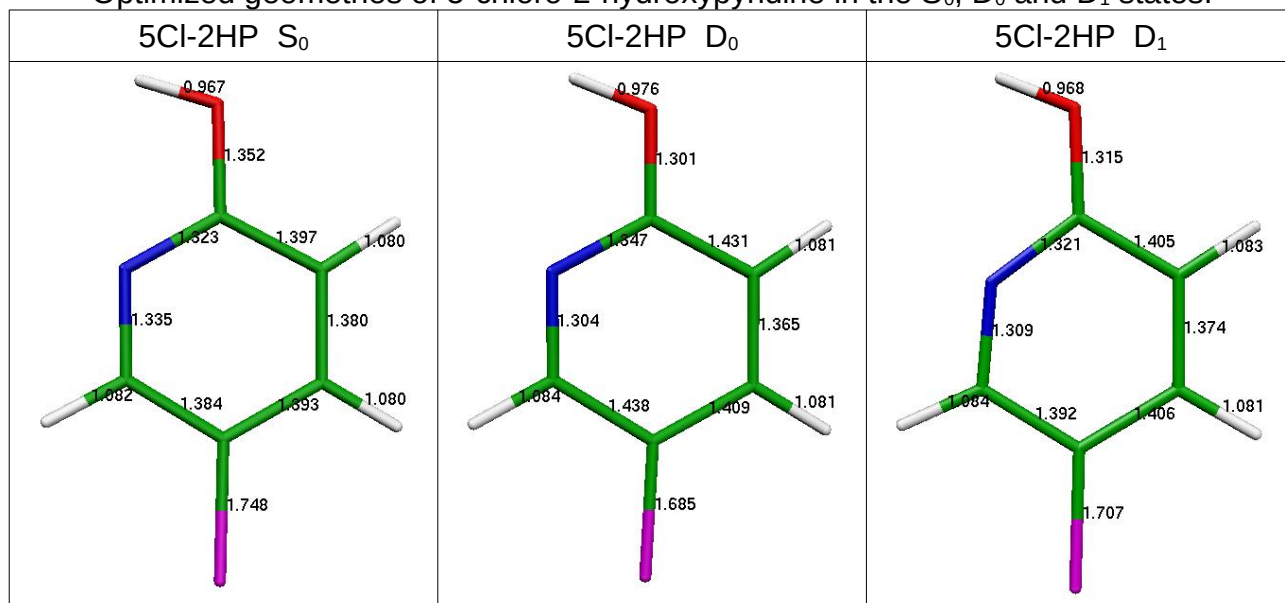

Figure S09.

Optimized geometries of 6-chloro-2-pyridone in the  $S_0$ ,  $D_0$  and  $D_1$  states.

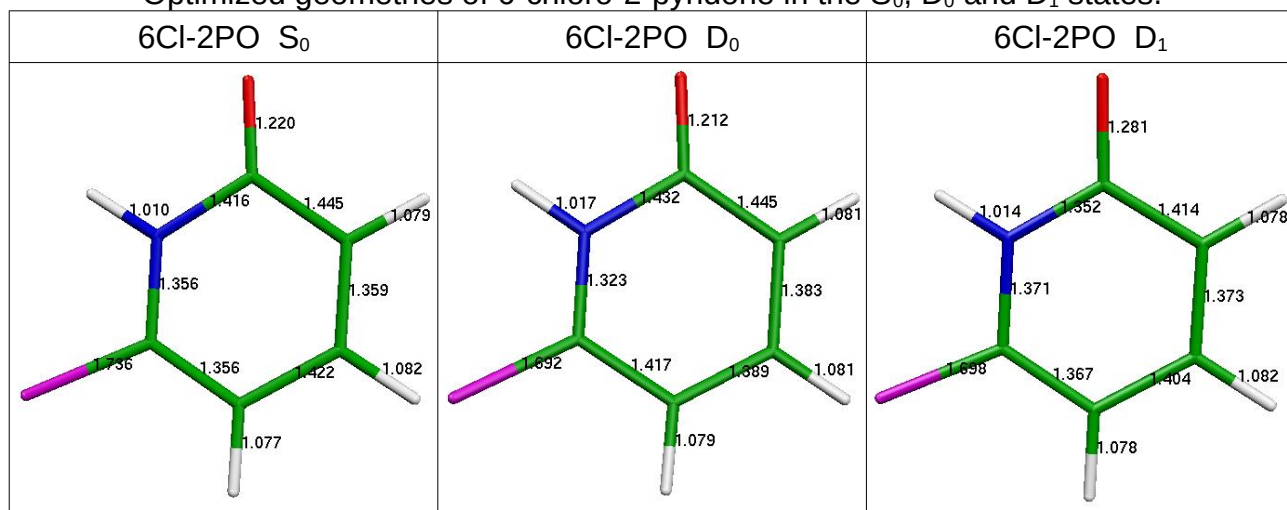

Figure S10.

Optimized geometries of 6-chloro-2-hydroxypyridine in the  $S_0$ ,  $D_0$  and  $D_1$  states.

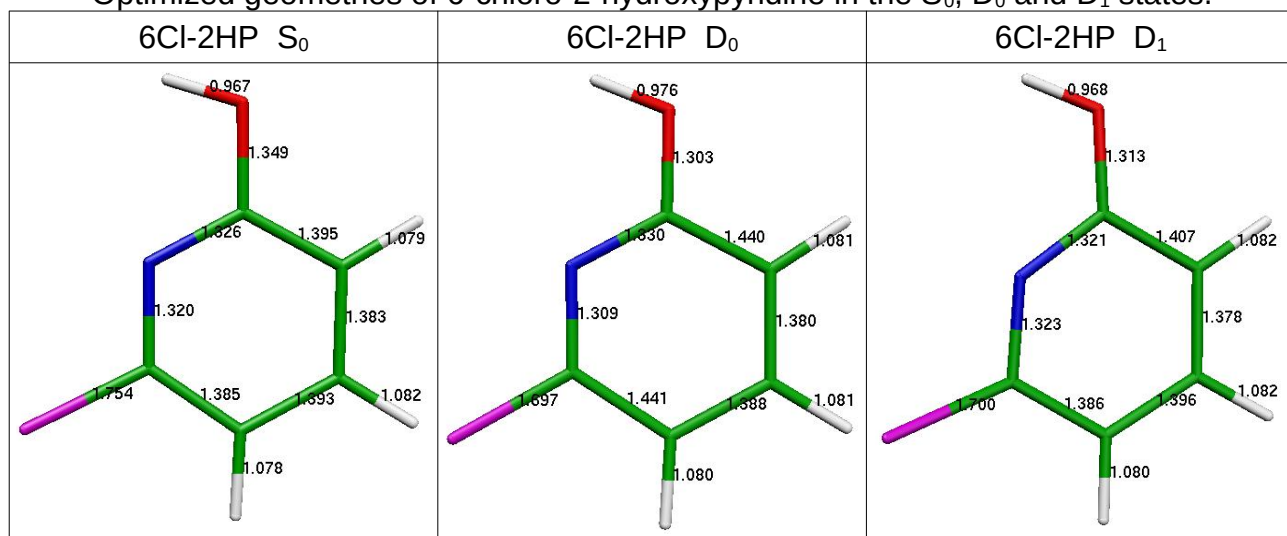

Figure S11.  
Frontier molecular orbitals of 2-pyridone at  $D_1$  geometry.

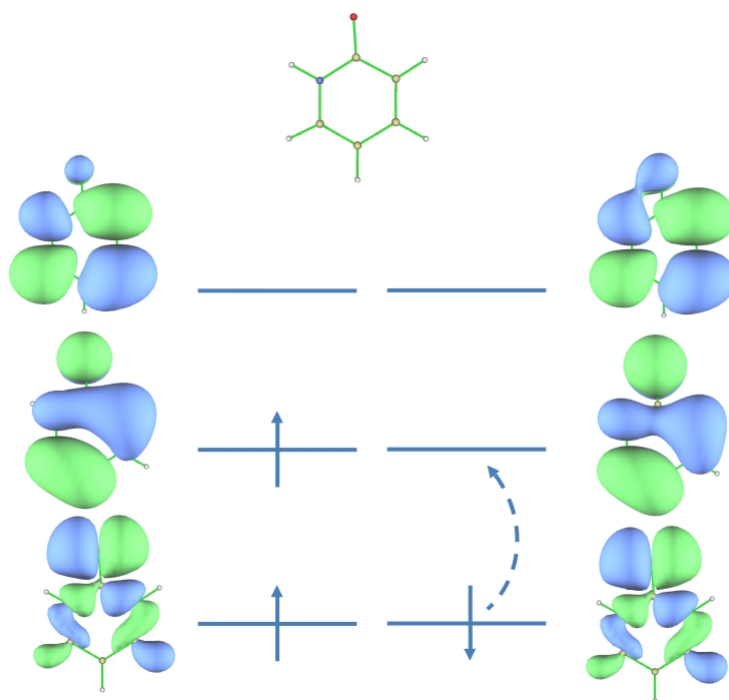

Figure S12.  
Frontier molecular orbitals of 2-hydroxypyridine at  $D_1$  geometry.

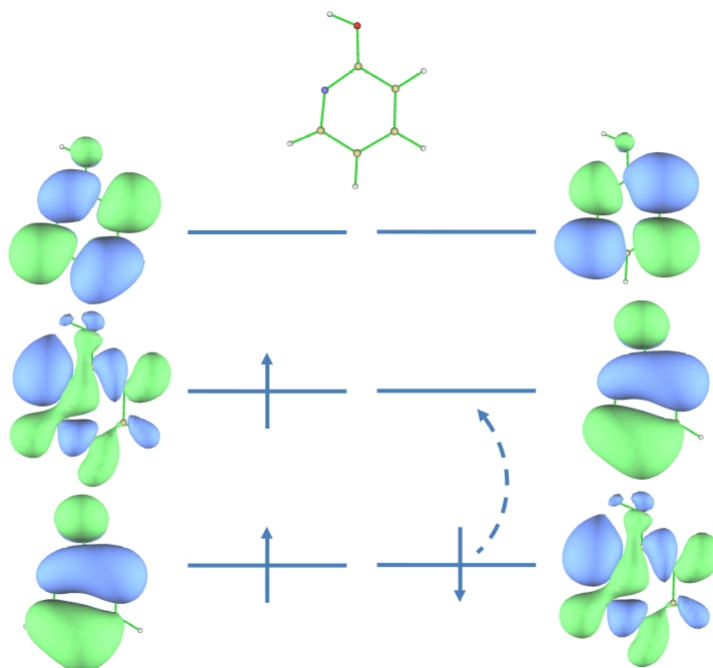

Figure S13.  
Frontier molecular orbitals of 3-chloro-2-pyridone at  $D_1$  geometry.

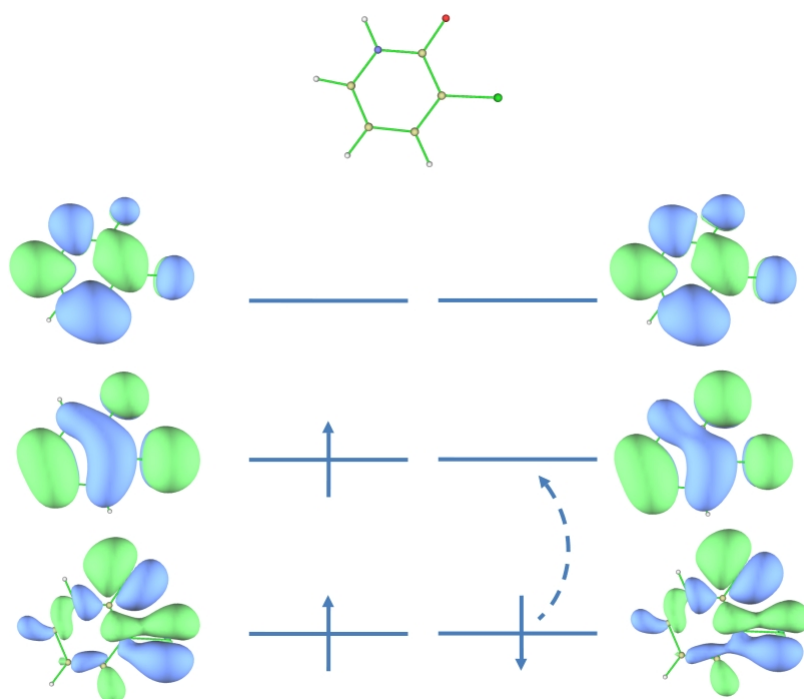

Figure S14.  
Frontier molecular orbitals of 3-chloro-2-hydroxypyridine at  $D_1$  geometry.

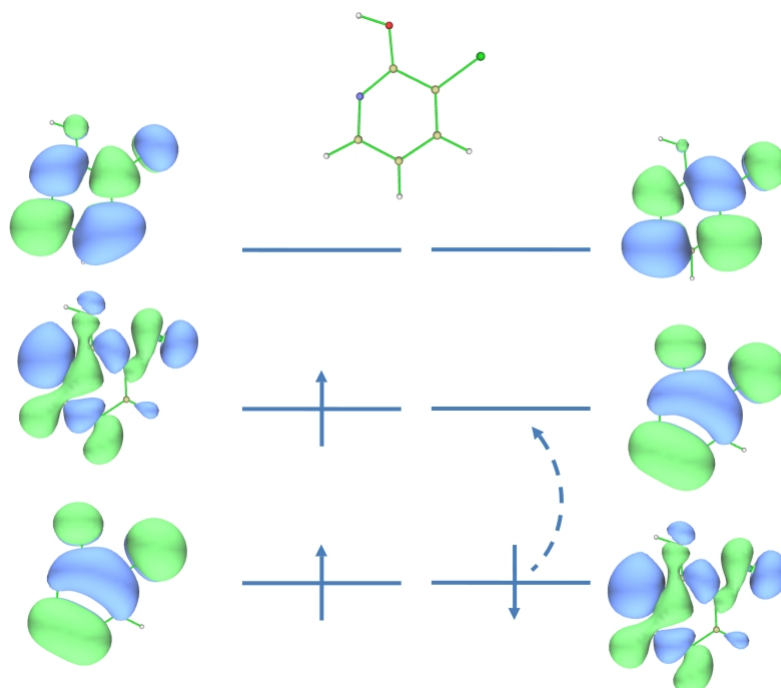

Figure S15.  
Frontier molecular orbitals of 5-chloro-2-pyridone at  $D_1$  geometry.

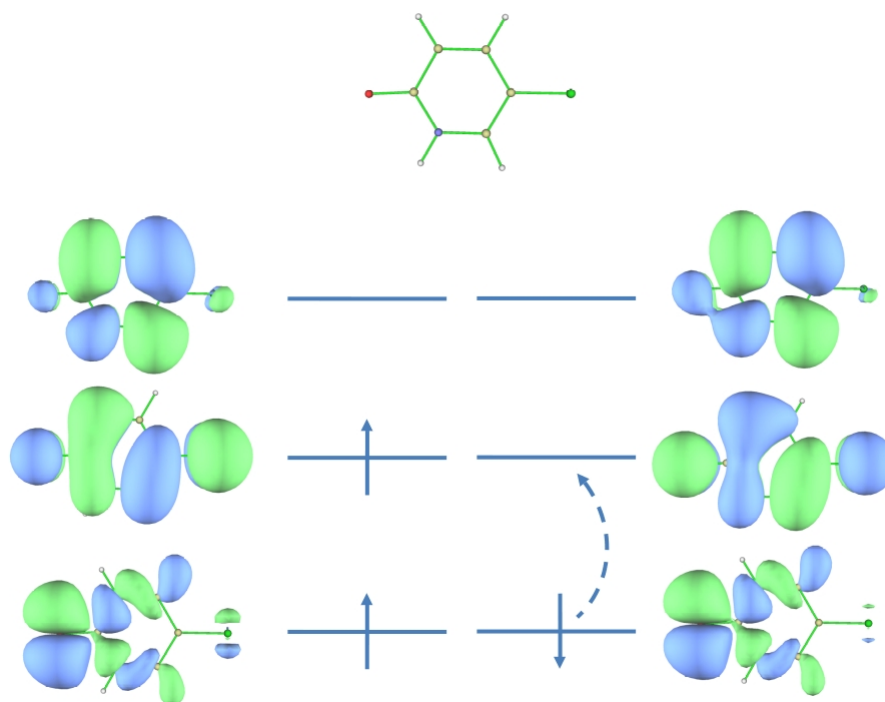

Figure S16.  
Frontier molecular orbitals of 5-chloro-2-hydroxypyridine at  $D_1$  geometry.

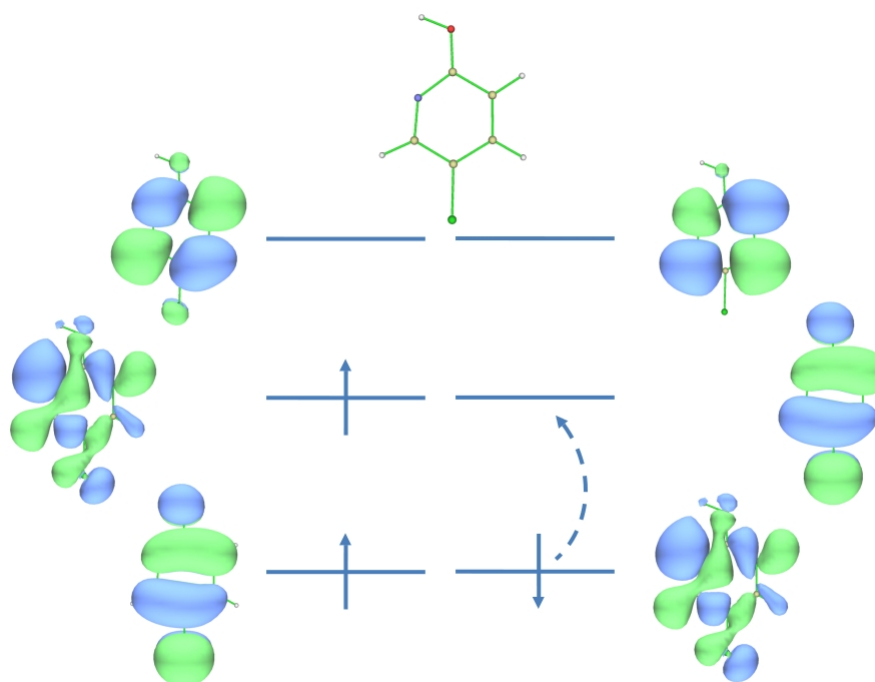

Figure S17.  
Frontier molecular orbitals of 6-chloro-2-pyridone at  $D_1$  geometry.

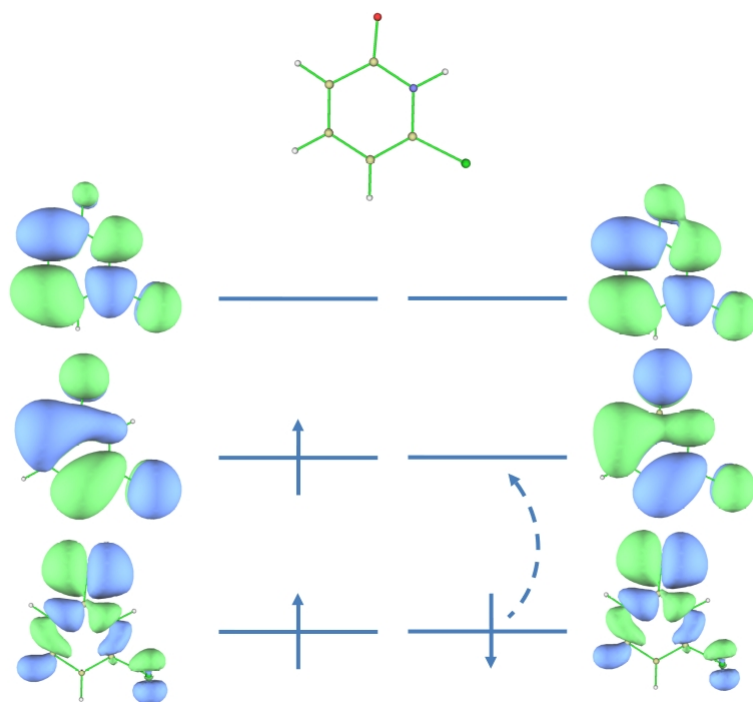

Figure S18.  
Frontier molecular orbitals of 6-chloro-2-hydroxypyridine at  $D_1$  geometry.

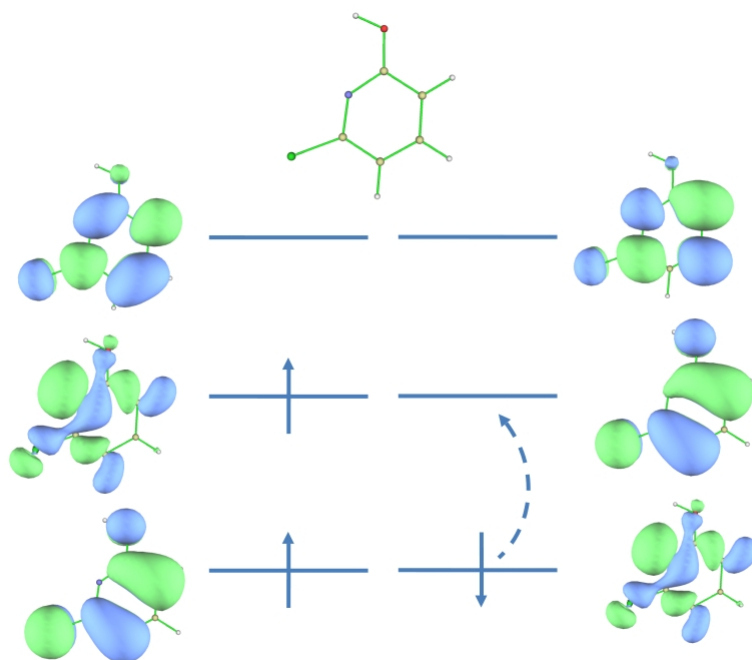

Figure S19.

The most active vibrational normal modes in the  $D_0$  state of 2-pyridone and its chlorinated analogues. Only modes with Huang Rhys factors greater than 0.1 are reported. The modes are collected in two groups: below and above  $1000\text{ cm}^{-1}$ .

| 2PO                                                                                 | 3Cl-2PO                                                                             | 4Cl-2PO                                                                             | 5Cl-2PO                                                                              | 6Cl-2PO                                                                               |
|-------------------------------------------------------------------------------------|-------------------------------------------------------------------------------------|-------------------------------------------------------------------------------------|--------------------------------------------------------------------------------------|---------------------------------------------------------------------------------------|
|    |    |    |    |    |
| 539 $\text{cm}^{-1}$                                                                | 567 $\text{cm}^{-1}$                                                                | 538 $\text{cm}^{-1}$                                                                | 388 $\text{cm}^{-1}$                                                                 | 260 $\text{cm}^{-1}$                                                                  |
|                                                                                     |                                                                                     |    |                                                                                      |    |
|                                                                                     |                                                                                     | 698 $\text{cm}^{-1}$                                                                |                                                                                      | 536 $\text{cm}^{-1}$                                                                  |
|                                                                                     |                                                                                     |   |                                                                                      |                                                                                       |
|                                                                                     |                                                                                     | 852 $\text{cm}^{-1}$                                                                |                                                                                      |                                                                                       |
|  |  |  |  |  |
| 1256 $\text{cm}^{-1}$                                                               | 1066 $\text{cm}^{-1}$                                                               | 1403 $\text{cm}^{-1}$                                                               | 1328 $\text{cm}^{-1}$                                                                | 1118 $\text{cm}^{-1}$                                                                 |
|  |  |                                                                                     |  |  |
| 1386 $\text{cm}^{-1}$                                                               | 1302 $\text{cm}^{-1}$                                                               |                                                                                     | 1600 $\text{cm}^{-1}$                                                                | 1430 $\text{cm}^{-1}$                                                                 |
|  |  |                                                                                     |                                                                                      |  |
| 1474 $\text{cm}^{-1}$                                                               | 1490 $\text{cm}^{-1}$                                                               |                                                                                     |                                                                                      | 1472 $\text{cm}^{-1}$                                                                 |

|  |                                                                                   |  |  |                                                                                     |
|--|-----------------------------------------------------------------------------------|--|--|-------------------------------------------------------------------------------------|
|  | 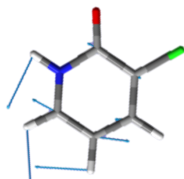 |  |  |  |
|  | 1569 cm <sup>-1</sup>                                                             |  |  | 1532 cm <sup>-1</sup>                                                               |



Figure S20.

The most active vibrational normal modes in the  $D_0$  state of 2-hydroxypyridine and its chlorinated analogues. Only modes with Huang Rhys factors greater than 0.1 are reported.

The modes are collected in two groups: below and above  $1000\text{ cm}^{-1}$ .

| 2HP                                                                                 | 3Cl-2HP                                                                             | 4Cl-2HP                                                                             | 5Cl-2HP                                                                              | 6Cl-2HP                                                                               |
|-------------------------------------------------------------------------------------|-------------------------------------------------------------------------------------|-------------------------------------------------------------------------------------|--------------------------------------------------------------------------------------|---------------------------------------------------------------------------------------|
|    |    |    |    |    |
| 545 $\text{cm}^{-1}$                                                                | 575 $\text{cm}^{-1}$                                                                | 547 $\text{cm}^{-1}$                                                                | 393 $\text{cm}^{-1}$                                                                 | 268 $\text{cm}^{-1}$                                                                  |
|    |                                                                                     |    |                                                                                      |    |
| 610 $\text{cm}^{-1}$                                                                |                                                                                     | 921 $\text{cm}^{-1}$                                                                |                                                                                      | 413 $\text{cm}^{-1}$                                                                  |
|   |                                                                                     |                                                                                     |                                                                                      |   |
| 984 $\text{cm}^{-1}$                                                                |                                                                                     |                                                                                     |                                                                                      | 474 $\text{cm}^{-1}$                                                                  |
|                                                                                     |                                                                                     |                                                                                     |                                                                                      |  |
|                                                                                     |                                                                                     |                                                                                     |                                                                                      | 545 $\text{cm}^{-1}$                                                                  |
|  |  |  |  |  |
| 1384 $\text{cm}^{-1}$                                                               | 1154 $\text{cm}^{-1}$                                                               | 1144 $\text{cm}^{-1}$                                                               | 1107 $\text{cm}^{-1}$                                                                | 1218 $\text{cm}^{-1}$                                                                 |
|  |  |  |  |  |
| 1603 $\text{cm}^{-1}$                                                               | 1557 $\text{cm}^{-1}$                                                               | 1386 $\text{cm}^{-1}$                                                               | 1147 $\text{cm}^{-1}$                                                                | 1373 $\text{cm}^{-1}$                                                                 |

|  |  |                                                                                   |                                                                                    |                                                                                     |
|--|--|-----------------------------------------------------------------------------------|------------------------------------------------------------------------------------|-------------------------------------------------------------------------------------|
|  |  | 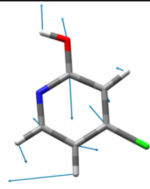 |  |  |
|  |  | 1477 cm <sup>-1</sup>                                                             | 1627 cm <sup>-1</sup>                                                              | 1572 cm <sup>-1</sup>                                                               |
|  |  |  |                                                                                    |                                                                                     |
|  |  | 1601 cm <sup>-1</sup>                                                             |                                                                                    |                                                                                     |

Figure S21.

The most active vibrational normal modes in the  $D_1$  state of 2-pyridone and its chlorinated analogues. Only modes with Huang Rhys factors greater than 0.1 are reported. The modes are collected in two groups: below and above  $1000\text{ cm}^{-1}$ .

| 2PO                                                                                 | 3Cl-2PO                                                                             | 4Cl-2PO                                                                             | 5Cl-2PO                                                                              | 6Cl-2PO                                                                               |
|-------------------------------------------------------------------------------------|-------------------------------------------------------------------------------------|-------------------------------------------------------------------------------------|--------------------------------------------------------------------------------------|---------------------------------------------------------------------------------------|
|    |    |    |    |    |
| 542 $\text{cm}^{-1}$                                                                | 179 $\text{cm}^{-1}$                                                                | 544 $\text{cm}^{-1}$                                                                | 390 $\text{cm}^{-1}$                                                                 | 456 $\text{cm}^{-1}$                                                                  |
|                                                                                     |                                                                                     |                                                                                     |                                                                                      |    |
|                                                                                     |                                                                                     |                                                                                     |                                                                                      | 546 $\text{cm}^{-1}$                                                                  |
|   |   |   |   |   |
| 1435 $\text{cm}^{-1}$                                                               | 1445 $\text{cm}^{-1}$                                                               | 1424 $\text{cm}^{-1}$                                                               | 1439 $\text{cm}^{-1}$                                                                | 1444 $\text{cm}^{-1}$                                                                 |
|  |  |  |  |  |
| 1616 $\text{cm}^{-1}$                                                               | 1629 $\text{cm}^{-1}$                                                               | 1601 $\text{cm}^{-1}$                                                               | 1615 $\text{cm}^{-1}$                                                                | 1609 $\text{cm}^{-1}$                                                                 |
|                                                                                     |                                                                                     |                                                                                     |  |                                                                                       |
|                                                                                     |                                                                                     |                                                                                     | 1648 $\text{cm}^{-1}$                                                                |                                                                                       |

Figure S22.

The most active vibrational normal modes in the  $D_1$  state of 2-hydroxypyridine and its chlorinated analogues. Only modes with Huang Rhys factors greater than 0.1 are reported.

The modes are collected in two groups: below and above  $1000\text{ cm}^{-1}$ .

| 2HP | 3Cl-2HP                                                                             | 4Cl-2HP | 5Cl-2HP                                                                              | 6Cl-2HP                                                                               |
|-----|-------------------------------------------------------------------------------------|---------|--------------------------------------------------------------------------------------|---------------------------------------------------------------------------------------|
|     | 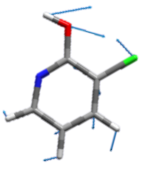   |         |    |    |
|     | 238 $\text{cm}^{-1}$                                                                |         | 388 $\text{cm}^{-1}$                                                                 | 208 $\text{cm}^{-1}$                                                                  |
|     |    |         |    |    |
|     | 486 $\text{cm}^{-1}$                                                                |         | 648 $\text{cm}^{-1}$                                                                 | 553 $\text{cm}^{-1}$                                                                  |
|     |   |         |   |   |
|     | 582 $\text{cm}^{-1}$                                                                |         | 678 $\text{cm}^{-1}$                                                                 | 703 $\text{cm}^{-1}$                                                                  |
|     |  |         |  |  |
|     | 694 $\text{cm}^{-1}$                                                                |         | 991 $\text{cm}^{-1}$                                                                 | 942 $\text{cm}^{-1}$                                                                  |
|     |  |         |                                                                                      |  |
|     | 856 $\text{cm}^{-1}$                                                                |         |                                                                                      | 980 $\text{cm}^{-1}$                                                                  |

|  |                                                                                   |  |                                                                                    |                                                                                      |
|--|-----------------------------------------------------------------------------------|--|------------------------------------------------------------------------------------|--------------------------------------------------------------------------------------|
|  | 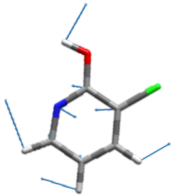 |  |  |   |
|  | 1058 cm <sup>-1</sup>                                                             |  | 1292 cm <sup>-1</sup>                                                              | 1245 cm <sup>-1</sup>                                                                |
|  |  |  |  |   |
|  | 1543 cm <sup>-1</sup>                                                             |  | 1648 cm <sup>-1</sup>                                                              | 1424 cm <sup>-1</sup>                                                                |
|  |                                                                                   |  |                                                                                    |   |
|  |                                                                                   |  |                                                                                    | 1554 cm <sup>-1</sup>                                                                |
|  |                                                                                   |  |                                                                                    |  |
|  |                                                                                   |  |                                                                                    | 1623 cm <sup>-1</sup>                                                                |
